## Development of new modular genetic tools for engineering the halophilic archaeon *Halobacterium salinarum*

Rafael Silva-Rocha, Marjorie C. Pontelli, Gilvan P. Furtado, Livia S. Zaramela and Tie Koide\*

### Supplementary Material

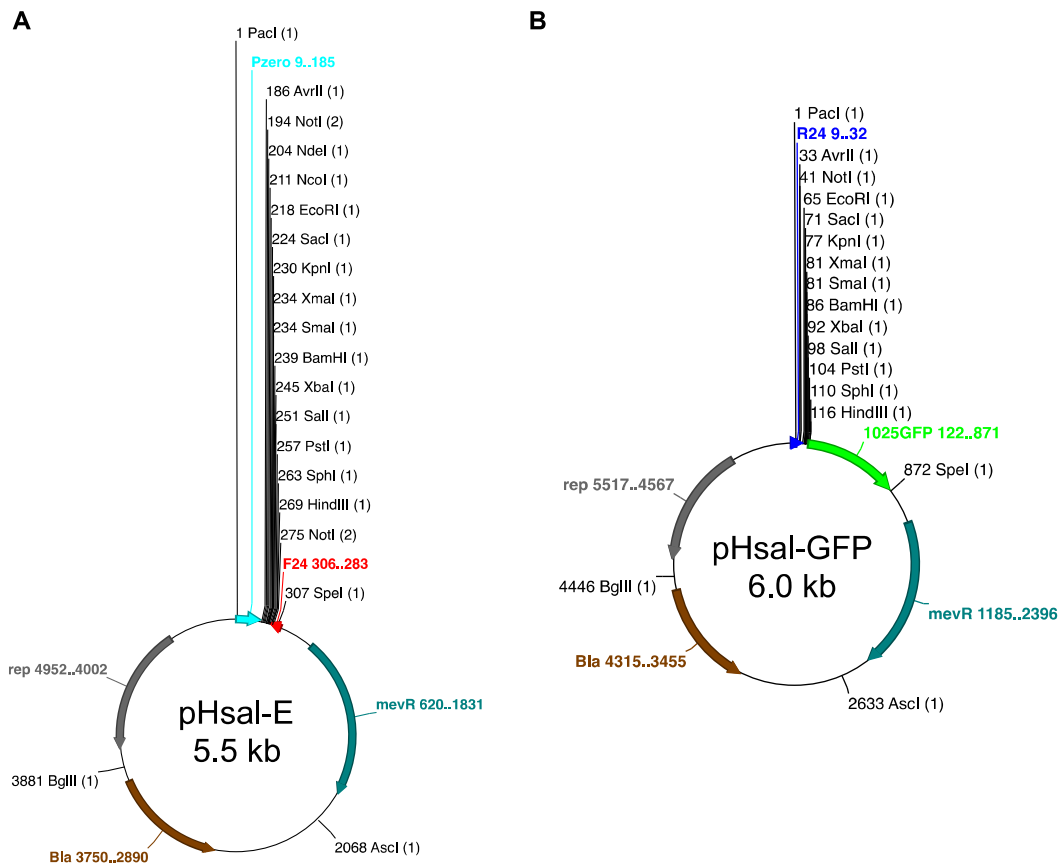

**Figure S1. Physical maps of the modular expression (pHsal-E) and reporter (pHsal-GFP) vectors.** The main features of the vectors are represented, along with their relative positions. Both pHsal-E and pHsal-GFP are formed by the cargo, a *mev<sup>R</sup>* resistance marker and an origin for autonomous replication in *H. salinarum* and a fragment with the *Ap<sup>R</sup>* resistance marker (*bla* gene) and the *ColE1* replication origin for replication and selection in *E. coli* hosts. **A)** pHsal-E, which has a strong expression system based on the *Pzero* promoter. **B)** pHsal-GFP, which has a GFP reporter gene for promoter probing in *H. salinarum*.
